# Supplementary material for: Blends of Human Milk Oligosaccharides Confer Intestinal Epithelial Barrier Protection In Vitro
Source: Nutrients. 2020 Oct 5;12(10):3047. doi: 10.3390/nu12103047 (PMC7599875; doi:10.3390/nu12103047)
Supplement: Supplementary file 1 [file nutrients-12-03047-s001.xlsx]

## Sheet: Suppl Table 1
Human Milk Oligosaccharides Confer Intestinal Epithelial Barrier Protection In vitro; Jane M. Natividad
On-line Supplementary Material
Suplementariy table 1. HMO concentration [mg/ml] and composition of the 49 treatments, as well as TEER and FD4 mean results before and after challenge, with SDpooled, SEpooled and Fisher’s LSD5% derived from one-way analysis of variance and subsequent multiple comparison procedure.
Blocks	Treatments		2'FL [mg/ml]	3'SL [mg/ml]	6'SL [mg/ml]	LNnT [mg/ml]	LNT [mg/ml]	DFL [mg/ml]	Lactose [mg/ml]	TEER before [%]	TEER after [%]	FD4 before [%]	FD4 after [%]
	Control +		0	0	0	0	0	0	0	100.431	76.1351	7.695	100
	Control -		0	0	0	0	0	0	0	100.973	102.524	7.709	13.6803
A	HMO6	0.3mg/ml	0.165	0.021	0.027	0.015	0.054	0.018	0	N/A	N/A	N/A	92.2348
		3mg/ml	1.65	0.21	0.27	0.15	0.54	0.18	0	N/A	N/A	N/A	71.8955
		30mg/ml	16.5	2.1	2.7	1.5	5.4	1.8	0	115.856	78.0542	7.39633	43.8155
		40mg/ml	22	2.8	3.6	2	7.2	2.4	0	117.426	89.2187	7.64667	41.3461
		60mg/ml	33	4.2	5.4	3	10.8	3.6	0	122.494	96.5417	5.728	35.2477
B	HMO3_01	60mg/ml HMO6-equivalent	33	4.2	5.4	0	0	0	0	122.109	90.64	N/A	18.7542
	HMO3_02		33	4.2	0	3	0	0	0	139.979	106.393	N/A	38.1755
	HMO3_03		33	4.2	0	0	10.8	0	0	123.093	94.689	N/A	16.122
	HMO3_04		33	4.2	0	0	0	3.6	0	118.976	68.759	N/A	24.2383
	HMO3_05		33	0	5.4	3	0	0	0	110.403	74.905	N/A	35.742
	HMO3_06		33	0	5.4	0	10.8	0	0	109.582	79.231	N/A	34.7223
	HMO3_07		33	0	5.4	0	0	3.6	0	110.597	80.217	N/A	24.9443
	HMO3_08		33	0	0	3	10.8	0	0	112.964	90.327	N/A	63.0463
	HMO3_09		33	0	0	3	0	3.6	0	114.917	88.023	N/A	46.3945
	HMO3_10		33	0	0	0	10.8	3.6	0	114.465	92.251	N/A	37.6675
	HMO3_11		0	4.2	5.4	3	0	0	0	105.75	75.372	N/A	67.9845
	HMO3_12		0	4.2	5.4	0	10.8	0	0	106.53	78.604	N/A	54.133
	HMO3_13		0	4.2	5.4	0	0	3.6	0	103.788	77.213	N/A	57.606
	HMO3_14		0	4.2	0	3	10.8	0	0	103.241	73.826	N/A	46.555
	HMO3_15		0	4.2	0	3	0	3.6	0	107.488	81.919	N/A	63.735
	HMO3_16		0	4.2	0	0	10.8	3.6	0	106.85	77.583	N/A	80.438
	HMO3_17		0	0	5.4	3	10.8	0	0	103.925	66.017	N/A	43.004
	HMO3_18		0	0	5.4	3	0	3.6	0	106.264	71.754	N/A	53.077
	HMO3_19		0	0	5.4	0	10.8	3.6	0	106.603	78.549	N/A	57.834
	HMO3_20		0	0	0	3	10.8	3.6	0	105.714	77.798	N/A	58.3257
C	HMO5 (w/o 2'FL)	30mg/ml HMO6-equivalent	0	2.1	2.7	1.5	5.4	1.8	0	93.158	64.764	N/A	73.848
	HMO5 (w/o 3'SL)		16.5	0	2.7	1.5	5.4	1.8	0	91.284	68.984	N/A	53.2647
	HMO5 (w/o 6'SL)		16.5	2.1	0	1.5	5.4	1.8	0	93.518	66.667	N/A	46
	HMO5 (w/o LNnT)		16.5	2.1	2.7	0	5.4	1.8	0	88.767	67.724	N/A	33.6123
	HMO5 (w/o LNT)		16.5	2.1	2.7	1.5	0	1.8	0	126.704	79.693	N/A	22.1847
	HMO5 (w/o DFL)		16.5	2.1	2.7	1.5	5.4	0	0	126.498	80.661	N/A	56.4393
	HMO5 (w/o 2'FL)	30mg/ml	0	4.66667	6	3.33333	12	4	0	N/A	N/A	N/A	69.8602
D	2'FL	30mg/ml HMO6-equivalent	16.5	0	0	0	0	0	0	116.782	94.474	N/A	55.5663
	3'SL		0	2.1	0	0	0	0	0	107.056	78.59	N/A	72.0667
	6'SL		0	0	2.7	0	0	0	0	97.974	70.033	N/A	72.8913
	LNnT		0	0	0	1.5	0	0	0	109.007	88.997	N/A	62.972
	LNT		0	0	0	0	5.4	0	0	104.912	75.052	N/A	66.4657
	DFL		0	0	0	0	0	1.8	0	95.667	40.388	N/A	84.6617
	Lactose		0	0	0	0	0	0	16.5	115.956	86.379	N/A	78.209
	2'FL	30mg/ml	30	0	0	0	0	0	0	104.226	66.6947	N/A	35.709
	3'SL		0	30	0	0	0	0	0	98.7703	62.864	N/A	75.1588
	6'SL		0	0	30	0	0	0	0	97.7623	66.2167	N/A	86.395
	LNnT		0	0	0	30	0	0	0	98.0553	66.3833	N/A	73.6617
	LNT		0	0	0	0	30	0	0	101.82	69.2273	N/A	48.3348
	DFL		0	0	0	0	0	30	0	99.2467	67.658	N/A	93.455
	Lactose		0	0	0	0	0	0	30	99.422	70.7498	N/A	86.1156
	2'FL Fermentation 1	30mg/ml	30	0	0	0	0	0	0	N/A	N/A	N/A	36.6437
	2'FL Fermentation 2		30	0	0	0	0	0	0	N/A	N/A	N/A	47.8903
	2'FL Chemical		30	0	0	0	0	0	0	N/A	N/A	N/A	42.4928
									Naverage	3	3	2	12
									SDpooled	5.6	10.1		30
									SEpooled	3.2	5.9		8.6
									LSD5%	9.2	16.6		24.5
